# Supplementary material
Source: PubMed Central journal article supplement (PMC8248717)
Supplement: mmc1.pdf [file mmc1.pdf]

**Med, Volume 2**

## **Supplemental information**

### **Real-time analysis of a mass vaccination effort confirms the safety of FDA-authorized mRNA COVID-19 vaccines**

**Reid McMurry, Patrick Lenehan, Samir Awasthi, Eli Silvert, Arjun Puranik, Colin Pawlowski, A.J. Venkatakrisnan, Praveen Anand, Vineet Agarwal, John C. O'Horo, Gregory J. Gores, Amy W. Williams, Andrew D. Badley, John Halamka, Abinash Virk, Melanie D. Swift, Katie Carlson, Deeksha Doddahonnaiah, Anna Metzger, Nikhil Kayal, Gabi Berner, Eshwan Ramudu, Corinne Carpenter, Tyler Wagner, Ajit Rajasekharan, and Venky Soundararajan**

## Supplemental Figures

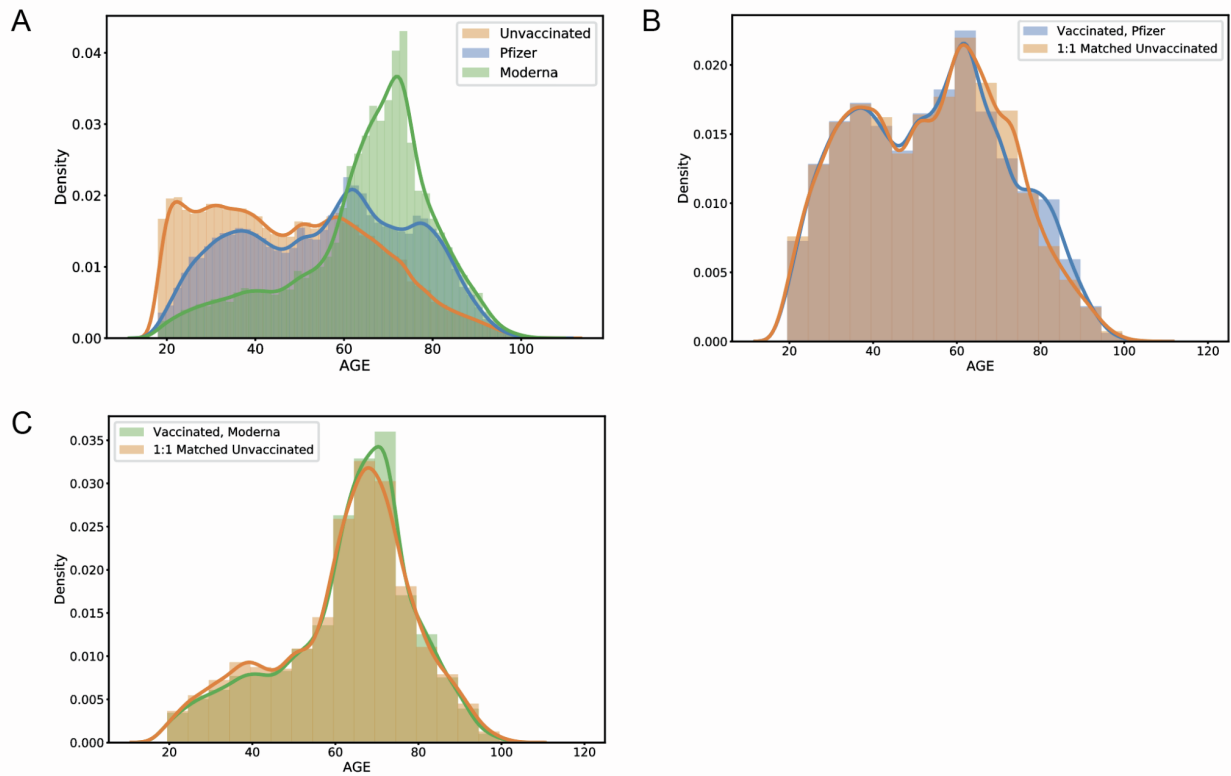

**Figure S1. Age distributions for vaccinated and unvaccinated cohorts before and after propensity matching, related to STAR Methods.** (A) Distribution of ages for vaccinated individuals and unvaccinated individuals before 1:1 matching. (B) Distribution of ages for individuals vaccinated with BNT162b2 and 1:1 matched unvaccinated individuals. (C) Distribution of ages for individuals vaccinated with mRNA-1273 and 1:1 matched unvaccinated individuals. These matched cohorts were used to assess the safety of each vaccine.

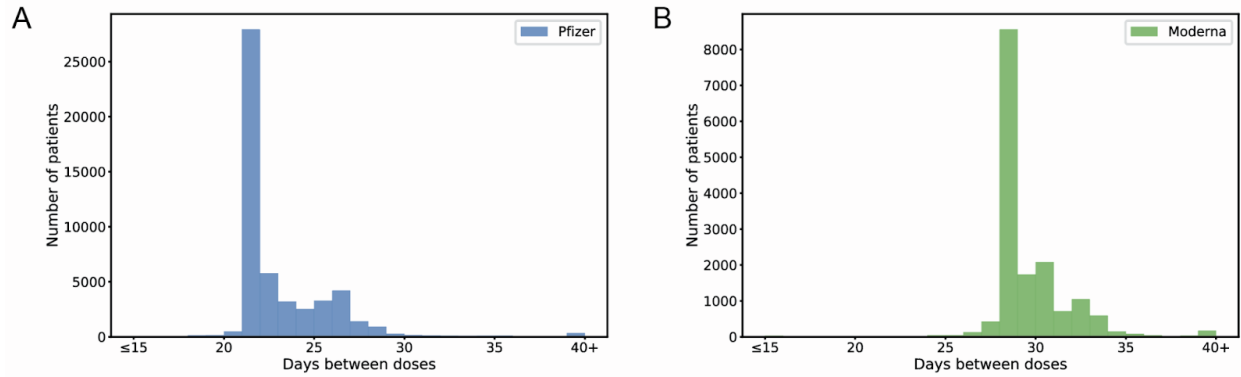

**Figure S2. Distribution of time between first and second vaccine doses for all individuals receiving two doses of BNT162b2 or mRNA-1273, related to STAR Methods.** (A) Distribution of time between doses for individuals receiving BNT162b2. It is recommended that the second dose is administered 21 days following the first. (B) Distribution of time between doses for individuals receiving mRNA-1273. It is recommended that the second dose is administered 28 days following the first. Consistent with these recommendations, the median and mode of time between doses among the analyzed individuals in the Mayo Clinic health system are 21 and 28 days for BNT162b2 and mRNA-1273, respectively.

## Supplemental Tables

**Table S1. Demographic and clinical characteristics of individuals vaccinated with BNT162b2 and their 1:1 propensity-matched unvaccinated cohorts, related to STAR Methods.** Covariates for matching include: (1) demographics (age, sex, race, ethnicity), (2) number of prior SARS-CoV-2 PCR tests before December 1, 2020, (3) number of influenza tests between February 1 and December 1, 2020, (4) residential location (zip code), and (5) long term care facility status. Note that sex, zip code, and long term care status are matched exactly between the two cohorts, so the proportion of individuals with each feature in these categories are identical. Highly balanced covariates with Standardized Mean Difference (SMD) < 0.1 are indicated with \*\*\*.

| Clinical covariate                   | BNT162b2 vaccinated cohort | 1:1 Propensity-matched unvaccinated cohort | Standardized Mean Difference (SMD) |
|--------------------------------------|----------------------------|--------------------------------------------|------------------------------------|
| Total number of individuals          | 51,795                     | 51,795                                     |                                    |
| Age, mean (SD)                       | 53.83 (18.32)              | 53.5 (18.02)                               | 0.02***                            |
| Age groups in years                  |                            |                                            |                                    |
| - 18-24                              | 2,419 (4.7%)               | 2,526 (4.9%)                               | 0.01***                            |
| - 25-34                              | 7,576 (14.6%)              | 7,550 (14.6%)                              | 0.00***                            |
| - 35-44                              | 8,367 (16.2%)              | 8,503 (16.4%)                              | 0.01***                            |
| - 45-54                              | 7,901 (15.3%)              | 7,764 (15.0%)                              | 0.01***                            |
| - 55-64                              | 10,546 (20.4%)             | 10,303 (19.9%)                             | 0.01***                            |
| - 65-74                              | 7,404 (14.3%)              | 8,929 (17.2%)                              | 0.08***                            |
| - 75+                                | 7,582 (14.6%)              | 6,220 (12.0%)                              | 0.08***                            |
| Sex                                  |                            |                                            |                                    |
| - Female                             | 31,099 (60.0%)             | 31,099 (60.0%)                             | 0.00***                            |
| - Male                               | 20,695 (40.0%)             | 20,695 (40.0%)                             | 0.00***                            |
| - Unknown                            | 1 (0.0%)                   | 1 (0.0%)                                   | 0.00***                            |
| Race                                 |                            |                                            |                                    |
| - Asian                              | 1,568 (3.0%)               | 1,602 (3.1%)                               | 0.00***                            |
| - Black / African American           | 1,156 (2.2%)               | 1,519 (2.9%)                               | 0.04***                            |
| - Native American                    | 127 (0.2%)                 | 126 (0.2%)                                 | 0.00***                            |
| - White / Caucasian                  | 47,270 (91.3%)             | 46,853 (90.5%)                             | 0.03***                            |
| - Other                              | 1,185 (2.3%)               | 1,253 (2.4%)                               | 0.01***                            |
| - Unknown                            | 489 (0.9%)                 | 442 (0.9%)                                 | 0.01***                            |
| Ethnicity                            |                            |                                            |                                    |
| - Hispanic or Latino                 | 1,676 (3.2%)               | 1,462 (2.8%)                               | 0.02***                            |
| - Not Hispanic or Latino             | 48,941 (94.5%)             | 49,304 (95.2%)                             | 0.03***                            |
| - Unknown                            | 1,178 (2.3%)               | 1,029 (2.0%)                               | 0.02***                            |
| Mean number of prior PCR tests       |                            |                                            |                                    |
| - Feb 1 - May 30, 2020               | 0.2282 (0.5282)            | 0.2152 (0.5171)                            | 0.02***                            |
| - Jun 1 - Aug 31, 2020               | 0.4562 (0.7652)            | 0.4547 (0.7775)                            | 0.00***                            |
| - Sep 1 - Nov 30, 2020               | 0.6488 (0.8929)            | 0.6585 (0.8835)                            | 0.01***                            |
| Mean number of prior influenza tests |                            |                                            |                                    |
| - Feb 1 - May 30, 2020               | 0.2122 (0.7284)            | 0.2324 (0.772)                             | 0.03***                            |
| - Jun 1 - Aug 31, 2020               | 0.01658 (0.2355)           | 0.0219 (0.2695)                            | 0.02***                            |
| - Sep 1 - Nov 30, 2020               | 0.04334 (0.3588)           | 0.04864 (0.3759)                           | 0.01***                            |

|                         |                |                |         |
|-------------------------|----------------|----------------|---------|
| State                   |                |                |         |
| - Arizona               | 3,572 (6.9%)   | 3,572 (6.9%)   | 0.00*** |
| - Florida               | 5,834 (11.3%)  | 5,834 (11.3%)  | 0.00*** |
| - Iowa                  | 133 (0.3%)     | 133 (0.3%)     | 0.00*** |
| - Minnesota             | 30,021 (58.0%) | 30,021 (58.0%) | 0.00*** |
| - Wisconsin             | 12,235 (23.6%) | 12,235 (23.6%) | 0.00*** |
| Long term care resident | 67 (0.1%)      | 67 (0.1%)      | 0.00*** |

**Table S2. Demographic and clinical characteristics of individuals vaccinated with mRNA-1273 and their 1:1 propensity-matched unvaccinated cohorts, related to STAR Methods.**

Covariates for matching include: (1) demographics (age, sex, race, ethnicity), (2) number of prior SARS-CoV-2 PCR tests before December 1, 2020, (3) number of influenza tests between February 1 and December 1, 2020, (4) residential location (zip code), and (5) long term care facility status. Note that sex, zip code, and long term care status are matched exactly between the two cohorts, so the proportion of individuals with each feature in these categories are identical. Highly balanced covariates with Standardized Mean Difference (SMD) < 0.1 are indicated with \*\*\*.

| Clinical covariate                   | mRNA-1273 vaccinated cohort | 1:1 Propensity-matched unvaccinated cohort | Standardized Mean Difference (SMD) |
|--------------------------------------|-----------------------------|--------------------------------------------|------------------------------------|
| Total number of individuals          | 16,471                      | 16,471                                     |                                    |
| Age, mean (SD)                       | 63 (16.14)                  | 62.23 (16.72)                              | 0.05***                            |
| Age groups in years                  |                             |                                            |                                    |
| - 18-24                              | 375 (2.3%)                  | 388 (2.4%)                                 | 0.01***                            |
| - 25-34                              | 926 (5.6%)                  | 1,074 (6.5%)                               | 0.04***                            |
| - 35-44                              | 1,285 (7.8%)                | 1,484 (9.0%)                               | 0.04***                            |
| - 45-54                              | 1,598 (9.7%)                | 1,601 (9.7%)                               | 0.00***                            |
| - 55-64                              | 3,402 (20.7%)               | 3,436 (20.9%)                              | 0.01***                            |
| - 65-74                              | 5,598 (34.0%)               | 5,121 (31.1%)                              | 0.06***                            |
| - 75+                                | 3,287 (20.0%)               | 3,367 (20.4%)                              | 0.01***                            |
| Sex                                  |                             |                                            |                                    |
| - Female                             | 8,758 (53.2%)               | 8,758 (53.2%)                              | 0.00***                            |
| - Male                               | 7,713 (46.8%)               | 7,713 (46.8%)                              | 0.00***                            |
| - Unknown                            | 0 (0.0%)                    | 0 (0.0%)                                   | N/A                                |
| Race                                 |                             |                                            |                                    |
| - Asian                              | 378 (2.3%)                  | 463 (2.8%)                                 | 0.03***                            |
| - Black / African American           | 530 (3.2%)                  | 437 (2.7%)                                 | 0.03***                            |
| - Native American                    | 44 (0.3%)                   | 30 (0.2%)                                  | 0.02***                            |
| - White / Caucasian                  | 15,088 (91.6%)              | 15,141 (91.9%)                             | 0.01***                            |
| - Other                              | 273 (1.7%)                  | 278 (1.7%)                                 | 0.00***                            |
| - Unknown                            | 158 (1.0%)                  | 122 (0.7%)                                 | 0.02***                            |
| Ethnicity                            |                             |                                            |                                    |
| - Hispanic or Latino                 | 522 (3.2%)                  | 408 (2.5%)                                 | 0.04***                            |
| - Not Hispanic or Latino             | 15,583 (94.6%)              | 15,834 (96.1%)                             | 0.07***                            |
| - Unknown                            | 366 (2.2%)                  | 229 (1.4%)                                 | 0.06***                            |
| Mean number of prior PCR tests       |                             |                                            |                                    |
| - Feb 1 - May 30, 2020               | 0.2189 (0.5214)             | 0.2168 (0.5282)                            | 0.00***                            |
| - Jun 1 - Aug 31, 2020               | 0.5114 (0.8292)             | 0.4902 (0.8364)                            | 0.03***                            |
| - Sep 1 - Nov 30, 2020               | 0.5724 (0.8154)             | 0.6195 (0.9051)                            | 0.05***                            |
| Mean number of prior influenza tests |                             |                                            |                                    |
| - Feb 1 - May 30, 2020               | 0.266 (0.85)                | 0.2498 (0.8491)                            | 0.02***                            |
| - Jun 1 - Aug 31, 2020               | 0.03967 (0.3932)            | 0.03291 (0.4238)                           | 0.02***                            |
| - Sep 1 - Nov 30, 2020               | 0.08333 (0.5536)            | 0.08354 (0.5692)                           | 0.02***                            |



|                         |               |               |         |
|-------------------------|---------------|---------------|---------|
| State                   |               |               |         |
| - Arizona               | 1,896 (11.5%) | 1,896 (11.5%) | 0.00*** |
| - Florida               | 5,453 (33.1%) | 5,453 (33.1%) | 0.00*** |
| - Iowa                  | 64 (0.4%)     | 64 (0.4%)     | 0.00*** |
| - Minnesota             | 6,299 (38.2%) | 6,299 (38.2%) | 0.00*** |
| - Wisconsin             | 2,759 (16.8%) | 2,759 (16.8%) | 0.00*** |
| Long term care resident | 50 (0.3%)     | 50 (0.3%)     | 0.00*** |

**Table S3. Number of individuals contributing Emergency Department (ED) notes in the vaccinated and unvaccinated cohorts ( $n_{\text{BNT162b2}} = 51,795$  each;  $n_{\text{mRNA-1273}} = 16,471$  each) during the 1, 7, 14, and 21 days after the first actual or assigned vaccination date, related to Table 1.** Percentages shown are obtained by dividing the number of individuals with at least one ED note by the total number of individuals in the cohort and multiplying by 100. To assess the magnitude and significance of difference between the percentages of patients with ED notes, the odds ratio (OR) and corresponding 95% CI are shown. With the null hypothesis that the OR falls between 0.91 and 1.1, a difference was considered significant if the upper bound of the 95% CI was less than 0.91 or the lower bound of the 95% CI was greater than 1.1.

| <b>Vaccine</b>                                | <b>Time Interval After First Actual or Assigned Dose</b> | <b>Vaccinated Cohort</b><br>Individuals with ED Visits<br>(% of Cohort) | <b>Unvaccinated Cohort</b><br>Individuals with ED Visits<br>(% of Cohort) | <b>Odds Ratio</b><br>(95% CI) |
|-----------------------------------------------|----------------------------------------------------------|-------------------------------------------------------------------------|---------------------------------------------------------------------------|-------------------------------|
| <b>BNT162b2</b><br><i>51,795 individuals</i>  | <b>1 Day</b>                                             | 106<br>(0.2%)                                                           | 189<br>(0.36%)                                                            | 0.56<br>(0.44 - 0.71)         |
|                                               | <b>7 Days</b>                                            | 567<br>(1.09%)                                                          | 752<br>(1.45%)                                                            | 0.75<br>(0.67 - 0.84)         |
|                                               | <b>14 Days</b>                                           | 1024<br>(1.98%)                                                         | 1376<br>(2.66%)                                                           | 0.74<br>(0.68 - 0.8)          |
|                                               | <b>21 Days</b>                                           | 1465<br>(2.83%)                                                         | 1983<br>(3.83%)                                                           | 0.73<br>(0.68 - 0.78)         |
| <b>mRNA-1273</b><br><i>16,471 individuals</i> | <b>1 Day</b>                                             | 50<br>(0.3%)                                                            | 50<br>(0.3%)                                                              | 1<br>(0.66 - 1.51)            |
|                                               | <b>7 Days</b>                                            | 238<br>(1.44%)                                                          | 219<br>(1.33%)                                                            | 1.09<br>(0.9 - 1.31)          |
|                                               | <b>14 Days</b>                                           | 464<br>(2.82%)                                                          | 406<br>(2.46%)                                                            | 1.15<br>(1 - 1.32)            |
|                                               | <b>21 Days</b>                                           | 693<br>(4.21%)                                                          | 628<br>(3.81%)                                                            | 1.11<br>(0.99 - 1.24)         |

**Table S4. Number of individuals contributing Emergency Department (ED) notes in the vaccinated and unvaccinated cohorts ( $n_{\text{BNT162b2}} = 39,058$  each;  $n_{\text{mRNA-1273}} = 11,851$  each) during the 1, 7, 14, and 21 days after the second actual or assigned vaccination date, related to Table 2.** Percentages shown are obtained by dividing the number of individuals with at least one ED note by the total number of individuals in the cohort and multiplying by 100. To assess the magnitude and significance of difference between the percentages of patients with ED notes, the odds ratio (OR) and corresponding 95% CI are shown. With the null hypothesis that the OR falls between 0.91 and 1.1, a difference was considered significant if the upper bound of the 95% CI was less than 0.91 or the lower bound of the 95% CI was greater than 1.1.

| <b>Vaccine</b>                                | <b>Time Interval After Second Actual or Assigned Dose</b> | <b>Vaccinated Cohort</b><br>Individuals with ED Visits<br>(% of Cohort) | <b>Unvaccinated Cohort</b><br>Individuals with ED Visits<br>(% of Cohort) | <b>Odds Ratio</b><br>(95% CI) |
|-----------------------------------------------|-----------------------------------------------------------|-------------------------------------------------------------------------|---------------------------------------------------------------------------|-------------------------------|
| <b>BNT162b2</b><br><i>39,058 individuals</i>  | <b>1 Day</b>                                              | 85<br>(0.22%)                                                           | 161<br>(0.41%)                                                            | 0.53<br>(0.4 - 0.69)          |
|                                               | <b>7 Days</b>                                             | 396<br>(1.01%)                                                          | 521<br>(1.33%)                                                            | 0.76<br>(0.66 - 0.87)         |
|                                               | <b>14 Days</b>                                            | 757<br>(1.94%)                                                          | 911<br>(2.33%)                                                            | 0.83<br>(0.75 - 0.91)         |
|                                               | <b>21 Days</b>                                            | 1028<br>(2.63%)                                                         | 1297<br>(3.32%)                                                           | 0.79<br>(0.72 - 0.86)         |
| <b>mRNA-1273</b><br><i>11,851 individuals</i> | <b>1 Day</b>                                              | 43<br>(0.36%)                                                           | 43<br>(0.36%)                                                             | 1<br>(0.64 - 1.56)            |
|                                               | <b>7 Days</b>                                             | 191<br>(1.61%)                                                          | 168<br>(1.42%)                                                            | 1.14<br>(0.92 - 1.41)         |
|                                               | <b>14 Days</b>                                            | 320<br>(2.7%)                                                           | 308<br>(2.6%)                                                             | 1.04<br>(0.88 - 1.22)         |
|                                               | <b>21 Days</b>                                            | 439<br>(3.7%)                                                           | 396<br>(3.34%)                                                            | 1.11<br>(0.97 - 1.28)         |

**Table S5. Number of Emergency Department (ED) notes contributed by vaccinated and unvaccinated individuals ( $n_{\text{BNT162b2}} = 51,795$  each;  $n_{\text{mRNA-1273}} = 16,471$  each) during the 1, 7, 14, and 21 days after the first actual or assigned vaccination date, related to Table 1.** The percentages shown were obtained by dividing the number of ED notes by the total number of clinical notes for the cohort in the given time interval (not shown) and multiplying by 100. To assess the magnitude and significance of difference between the percentages of ED notes, the odds ratio (OR) and corresponding 95% CI are shown. With the null hypothesis that the OR falls between 0.91 and 1.1, a difference was considered significant if the upper bound of the 95% CI was less than 0.91 or the lower bound of the 95% CI was greater than 1.1.

| <b>Vaccine</b>                                        | <b>Time Interval After First Actual or Assigned Dose</b> | <b>Vaccinated Cohort</b><br>Number of ED Notes<br>(% of All Notes) | <b>Unvaccinated Cohort</b><br>Number of ED Notes<br>(% of All Notes) | <b>Odds Ratio</b><br>(95% CI) |
|-------------------------------------------------------|----------------------------------------------------------|--------------------------------------------------------------------|----------------------------------------------------------------------|-------------------------------|
| <b>BNT162b2</b><br><br><i>51,795<br/>individuals</i>  | <b>1 Day</b>                                             | 128<br>(2.36%)                                                     | 250<br>(3.3%)                                                        | 0.71<br>(0.57 - 0.88)         |
|                                                       | <b>7 Days</b>                                            | 735<br>(3.54%)                                                     | 1002<br>(3.75%)                                                      | 0.94<br>(0.85 - 1.04)         |
|                                                       | <b>14 Days</b>                                           | 1344<br>(3.24%)                                                    | 1846<br>(3.71%)                                                      | 0.87<br>(0.81 - 0.93)         |
|                                                       | <b>21 Days</b>                                           | 1900<br>(3.08%)                                                    | 2744<br>(3.76%)                                                      | 0.81<br>(0.77 - 0.86)         |
| <b>mRNA-1273</b><br><br><i>16,471<br/>individuals</i> | <b>1 Day</b>                                             | 60<br>(3.05%)                                                      | 62<br>(2.29%)                                                        | 1.34<br>(0.92 - 1.96)         |
|                                                       | <b>7 Days</b>                                            | 287<br>(3.25%)                                                     | 283<br>(2.74%)                                                       | 1.19<br>(1.01 - 1.42)         |
|                                                       | <b>14 Days</b>                                           | 600<br>(3.2%)                                                      | 541<br>(2.82%)                                                       | 1.14<br>(1.01 - 1.28)         |
|                                                       | <b>21 Days</b>                                           | 904<br>(3.1%)                                                      | 837<br>(2.97%)                                                       | 1.05<br>(0.95 - 1.15)         |

**Table S6. Number of Emergency Department (ED) notes contributed by vaccinated and unvaccinated individuals ( $n_{\text{BNT162b2}} = 39,058$  each;  $n_{\text{mRNA-1273}} = 11,851$  each) during the 1, 7, 14, and 21 days after the second actual or assigned vaccination date, related to Table 2.**

The percentages shown were obtained by dividing the number of ED notes by the total number of clinical notes for the cohort in the given time interval (not shown) and multiplying by 100. To assess the magnitude and significance of difference between the percentages of ED notes, the odds ratio (OR) and corresponding 95% CI are shown. With the null hypothesis that the OR falls between 0.91 and 1.1, a difference was considered significant if the upper bound of the 95% CI was less than 0.91 or the lower bound of the 95% CI was greater than 1.1.

| <b>Vaccine</b>                                        | <b>Time Interval After Second Actual or Assigned Dose</b> | <b>Vaccinated Cohort</b><br>Number of ED Notes<br>(% of All Notes) | <b>Unvaccinated Cohort</b><br>Number of ED Notes<br>(% of All Notes) | <b>Odds Ratio</b><br>(95% CI) |
|-------------------------------------------------------|-----------------------------------------------------------|--------------------------------------------------------------------|----------------------------------------------------------------------|-------------------------------|
| <b>BNT162b2</b><br><br><i>39,058<br/>individuals</i>  | <b>1 Day</b>                                              | 100<br>(2.54%)                                                     | 194<br>(3.52%)                                                       | 0.71<br>(0.55 - 0.92)         |
|                                                       | <b>7 Days</b>                                             | 496<br>(3.3%)                                                      | 671<br>(3.59%)                                                       | 0.92<br>(0.81 - 1.03)         |
|                                                       | <b>14 Days</b>                                            | 963<br>(3.22%)                                                     | 1190<br>(3.5%)                                                       | 0.92<br>(0.84 - 1)            |
|                                                       | <b>21 Days</b>                                            | 1332<br>(3.01%)                                                    | 1731<br>(3.57%)                                                      | 0.84<br>(0.78 - 0.9)          |
| <b>mRNA-1273</b><br><br><i>11,851<br/>individuals</i> | <b>1 Day</b>                                              | 50<br>(3.16%)                                                      | 52<br>(2.7%)                                                         | 1.18<br>(0.78 - 1.78)         |
|                                                       | <b>7 Days</b>                                             | 232<br>(3.22%)                                                     | 204<br>(2.81%)                                                       | 1.15<br>(0.95 - 1.4)          |
|                                                       | <b>14 Days</b>                                            | 397<br>(2.78%)                                                     | 393<br>(2.96%)                                                       | 0.94<br>(0.81 - 1.08)         |
|                                                       | <b>21 Days</b>                                            | 560<br>(2.72%)                                                     | 505<br>(2.73%)                                                       | 1<br>(0.88 - 1.13)            |

**Table S7. Incidence rates of adverse effects in the 14 days following the date of the first BNT162b2 or mRNA-1273 dose, related to Figure 3A.** For each adverse effect, incidence rates were calculated for the vaccinated and propensity matched unvaccinated cohorts as the number of positive cases divided by the total number of at-risk person days during this time period. Individuals were considered at risk for developing an adverse effect from their actual or assigned date of first vaccination until they experienced the event, died, or reached the end of the 14-day study period, or until four days prior to a positive SARS-CoV-2 test. For example, we see that 849 cases of fatigue were recorded in the BNT162b2 vaccinated cohort over a total of 715,390 person-days, corresponding to an incidence rate of 1.2 cases per 1000 person-days. N/A, not applicable; inf, infinity.

| Vaccine                        | Adverse effect       | Vaccinated<br>Incidence Rate                                   | Unvaccinated<br>Incidence Rate                               | Incidence Rate<br>Ratio (95% CI) |
|--------------------------------|----------------------|----------------------------------------------------------------|--------------------------------------------------------------|----------------------------------|
|                                |                      | Cases / Person-Days<br><i>[Cases Per 1000<br/>Person-Days]</i> | Cases/Person-Days<br><i>[Cases Per 1000<br/>Person-Days]</i> |                                  |
| BNT162b2<br>(n = 51,795 each)  | Anaphylaxis          | 16 / 721,797 [0.022]                                           | 25 / 716,676 [0.035]                                         | 0.64 (0.32, 1.2)                 |
|                                | Arthralgia           | 698 / 716,595 [0.97]                                           | 473 / 713,187 [0.66]                                         | 1.5 (1.3, 1.7)                   |
|                                | Chills               | 134 / 720,984 [0.19]                                           | 175 / 715,564 [0.24]                                         | 0.76 (0.6, 0.96)                 |
|                                | CVST                 | 1 / 721,940 [0.0014]                                           | 3 / 716,857 [0.0042]                                         | 0.33 (0.0063, 4.1)               |
|                                | Diarrhea             | 361 / 719,310 [0.5]                                            | 527 / 712,832 [0.74]                                         | 0.68 (0.59, 0.78)                |
|                                | Erythema             | 539 / 717,966 [0.75]                                           | 513 / 713,076 [0.72]                                         | 1 (0.92, 1.2)                    |
|                                | Facial paralysis     | 10 / 721,894 [0.014]                                           | 20 / 716,717 [0.028]                                         | 0.5 (0.21, 1.1)                  |
|                                | Fatigue              | 849 / 715,390 [1.2]                                            | 1133 / 708,159 [1.6]                                         | 0.74 (0.68, 0.81)                |
|                                | Fever                | 261 / 720,157 [0.36]                                           | 297 / 714,572 [0.42]                                         | 0.87 (0.74, 1)                   |
|                                | Headache             | 995 / 714,571 [1.4]                                            | 1078 / 708,785 [1.5]                                         | 0.92 (0.84, 1)                   |
|                                | Local pain           | 8 / 721,890 [0.011]                                            | 1 / 716,873 [0.0014]                                         | 7.9 (1.1, 350)                   |
|                                | Local swelling       | 4 / 721,911 [0.0055]                                           | 0 / 716,886 [0]                                              | inf (0.66, inf)                  |
|                                | Lymphadenopathy      | 241 / 720,256 [0.33]                                           | 250 / 715,014 [0.35]                                         | 0.96 (0.8, 1.1)                  |
|                                | Myalgia              | 693 / 716,553 [0.97]                                           | 532 / 712,824 [0.75]                                         | 1.3 (1.2, 1.5)                   |
|                                | Nausea               | 678 / 717,130 [0.95]                                           | 885 / 710,220 [1.2]                                          | 0.76 (0.69, 0.84)                |
|                                | Soreness             | 218 / 720,204 [0.3]                                            | 149 / 715,736 [0.21]                                         | 1.5 (1.2, 1.8)                   |
| Vomiting                       | 274 / 720,015 [0.38] | 497 / 713,228 [0.7]                                            | 0.55 (0.47, 0.63)                                            |                                  |
| mRNA-1273<br>(n = 16,471 each) | Anaphylaxis          | 2 / 229,651 [0.0087]                                           | 11 / 228,602 [0.048]                                         | 0.18 (0.019, 0.83)               |
|                                | Arthralgia           | 361 / 226,983 [1.6]                                            | 223 / 227,116 [0.98]                                         | 1.6 (1.4, 1.9)                   |
|                                | Chills               | 56 / 229,293 [0.24]                                            | 46 / 228,329 [0.2]                                           | 1.2 (0.81, 1.8)                  |
|                                | CVST                 | 0 / 229,669 [0]                                                | 1 / 228,683 [0.0044]                                         | 0 (0, 39)                        |
|                                | Diarrhea             | 161 / 228,507 [0.7]                                            | 224 / 227,045 [0.99]                                         | 0.71 (0.58, 0.88)                |

|  |                  |                      |                      |                  |
|--|------------------|----------------------|----------------------|------------------|
|  | Erythema         | 257 / 227,814 [1.1]  | 195 / 227,303 [0.86] | 1.3 (1.1, 1.6)   |
|  | Facial paralysis | 2 / 229,664 [0.0087] | 5 / 228,662 [0.022]  | 0.4 (0.038, 2.4) |
|  | Fatigue          | 456 / 226,290 [2]    | 481 / 225,043 [2.1]  | 0.94 (0.83, 1.1) |
|  | Fever            | 123 / 228,802 [0.54] | 130 / 227,692 [0.57] | 0.94 (0.73, 1.2) |
|  | Headache         | 351 / 227,156 [1.5]  | 358 / 226,095 [1.6]  | 0.98 (0.84, 1.1) |
|  | Local pain       | 6 / 229,625 [0.026]  | 1 / 228,690 [0.0044] | 6 (0.72, 270)    |
|  | Local swelling   | 0 / 229,669 [0]      | 0 / 228,691 [0]      | N/A              |
|  | Lymphadenopathy  | 142 / 228,640 [0.62] | 116 / 227,881 [0.51] | 1.2 (0.95, 1.6)  |
|  | Myalgia          | 356 / 227,194 [1.6]  | 219 / 227,077 [0.96] | 1.6 (1.4, 1.9)   |
|  | Nausea           | 303 / 227,522 [1.3]  | 334 / 226,234 [1.5]  | 0.9 (0.77, 1.1)  |
|  | Soreness         | 86 / 229,063 [0.38]  | 59 / 228,254 [0.26]  | 1.5 (1, 2.1)     |
|  | Vomiting         | 154 / 228,652 [0.67] | 190 / 227,390 [0.84] | 0.81 (0.65, 1)   |

**Table S8. Incidence rates of adverse effects in the 14 days following the date of the second BNT162b2 or mRNA-1273 dose, related to Figure 3A.** For each adverse effect, incidence rates were calculated for the vaccinated and propensity matched unvaccinated cohorts as the number of positive cases divided by the total number of at-risk person days during this time period. Individuals were considered at risk for developing an adverse effect from their actual or assigned date of first vaccination until they experienced the event, died, or reached the end of the 14-day study period, or until four days prior to a positive SARS-CoV-2 test. For example, we see that 619 cases of fatigue were recorded in the BNT162b2 vaccinated cohort over a total of 541,561 person-days, corresponding to an incidence rate of 1.1 cases per 1000 person-days. N/A, not applicable; inf, infinity.

| Vaccine                        | Adverse effect       | Vaccinated Incidence Rate                                  | Unvaccinated Incidence Rate                                | Incidence Rate Ratio (95% CI) |
|--------------------------------|----------------------|------------------------------------------------------------|------------------------------------------------------------|-------------------------------|
|                                |                      | Cases / Person-Days<br><i>[Cases Per 1000 Person-Days]</i> | Cases / Person-Days<br><i>[Cases Per 1000 Person-Days]</i> |                               |
| BNT162b2<br>(n = 39,058 each)  | Anaphylaxis          | 5 / 546,187 [0.0092]                                       | 23 / 528,677 [0.044]                                       | 0.21 (0.062, 0.57)            |
|                                | Arthralgia           | 508 / 542,294 [0.94]                                       | 343 / 526,159 [0.65]                                       | 1.4 (1.3, 1.7)                |
|                                | Chills               | 119 / 545,288 [0.22]                                       | 123 / 527,940 [0.23]                                       | 0.94 (0.72, 1.2)              |
|                                | CVST                 | 0 / 546,223 [0]                                            | 1 / 528,868 [0.0019]                                       | 0 (0, 38)                     |
|                                | Diarrhea             | 259 / 544,344 [0.48]                                       | 390 / 525,891 [0.74]                                       | 0.64 (0.55, 0.75)             |
|                                | Erythema             | 441 / 542,758 [0.81]                                       | 374 / 525,957 [0.71]                                       | 1.1 (0.99, 1.3)               |
|                                | Facial paralysis     | 7 / 546,166 [0.013]                                        | 11 / 528,780 [0.021]                                       | 0.62 (0.2, 1.7)               |
|                                | Fatigue              | 619 / 541,561 [1.1]                                        | 788 / 522,771 [1.5]                                        | 0.76 (0.68, 0.84)             |
|                                | Fever                | 182 / 545,043 [0.33]                                       | 222 / 527,022 [0.42]                                       | 0.79 (0.65, 0.97)             |
|                                | Headache             | 700 / 540,865 [1.3]                                        | 738 / 523,104 [1.4]                                        | 0.92 (0.83, 1)                |
|                                | Local pain           | 4 / 546,191 [0.0073]                                       | 0 / 528,875 [0]                                            | inf (0.64, inf)               |
|                                | Local swelling       | 0 / 546,223 [0]                                            | 2 / 528,867 [0.0038]                                       | 0 (0, 5.2)                    |
|                                | Lymphadenopathy      | 198 / 544,761 [0.36]                                       | 187 / 527,398 [0.35]                                       | 1 (0.84, 1.3)                 |
|                                | Myalgia              | 553 / 541,905 [1]                                          | 372 / 525,880 [0.71]                                       | 1.4 (1.3, 1.6)                |
|                                | Nausea               | 472 / 542,820 [0.87]                                       | 659 / 523,701 [1.3]                                        | 0.69 (0.61, 0.78)             |
|                                | Soreness             | 159 / 544,936 [0.29]                                       | 104 / 528,119 [0.2]                                        | 1.5 (1.1, 1.9)                |
| Vomiting                       | 199 / 544,875 [0.37] | 379 / 525,893 [0.72]                                       | 0.51 (0.42, 0.6)                                           |                               |
| mRNA-1273<br>(n = 11,851 each) | Anaphylaxis          | 1 / 165,856 [0.006]                                        | 9 / 160,479 [0.056]                                        | 0.11 (0.0025, 0.78)           |
|                                | Arthralgia           | 287 / 163,803 [1.8]                                        | 135 / 159,537 [0.85]                                       | 2.1 (1.7, 2.6)                |
|                                | Chills               | 47 / 165,462 [0.28]                                        | 47 / 160,219 [0.29]                                        | 0.97 (0.63, 1.5)              |
|                                | CVST                 | 0 / 165,870 [0]                                            | 0 / 160,544 [0]                                            | N/A                           |



|  |                  |                     |                      |                   |
|--|------------------|---------------------|----------------------|-------------------|
|  | Diarrhea         | 97 / 165,143 [0.59] | 156 / 159,369 [0.98] | 0.6 (0.46, 0.78)  |
|  | Erythema         | 186 / 164,434 [1.1] | 136 / 159,503 [0.85] | 1.3 (1.1, 1.7)    |
|  | Facial paralysis | 2 / 165,857 [0.012] | 8 / 160,478 [0.05]   | 0.24 (0.025, 1.2) |
|  | Fatigue          | 343 / 163,393 [2.1] | 332 / 158,089 [2.1]  | 1 (0.86, 1.2)     |
|  | Fever            | 91 / 165,178 [0.55] | 91 / 159,887 [0.57]  | 0.97 (0.72, 1.3)  |
|  | Headache         | 241 / 164,176 [1.5] | 212 / 158,908 [1.3]  | 1.1 (0.91, 1.3)   |
|  | Local pain       | 1 / 165,862 [0.006] | 0 / 160,544 [0]      | inf (0.025, inf)  |
|  | Local swelling   | 0 / 165,870 [0]     | 0 / 160,544 [0]      | N/A               |
|  | Lymphadenopathy  | 96 / 165,148 [0.58] | 85 / 159,941 [0.53]  | 1.1 (0.81, 1.5)   |
|  | Myalgia          | 278 / 163,735 [1.7] | 142 / 159,508 [0.89] | 1.9 (1.6, 2.4)    |
|  | Nausea           | 191 / 164,349 [1.2] | 232 / 158,783 [1.5]  | 0.8 (0.65, 0.97)  |
|  | Soreness         | 62 / 165,436 [0.37] | 39 / 160,247 [0.24]  | 1.5 (1, 2.4)      |
|  | Vomiting         | 94 / 165,178 [0.57] | 131 / 159,618 [0.82] | 0.69 (0.53, 0.91) |

**Table S9. Incidence rates of adverse effects in the 21 days following the date of the first BNT162b2 or mRNA-1273 dose, related to Figure 3B.** For each adverse effect, incidence rates were calculated for the vaccinated and propensity matched unvaccinated cohorts as the number of positive cases divided by the total number of at-risk person days during this time period. Individuals were considered at risk for developing an adverse effect from their actual or assigned date of first vaccination until they experienced the event, died, or reached the end of the 21-day study period, or until four days prior to a positive SARS-CoV-2 test. For example, we see that 1206 cases of fatigue were recorded in the BNT162b2 vaccinated cohort over a total of 1,068,371 person-days, corresponding to an incidence rate of 1.1 cases per 1000 person-days. N/A, not applicable; inf, infinity.

| Vaccine                        | Adverse effect         | Vaccinated                   | Unvaccinated                 | Incidence Rate Ratio (95% CI) |
|--------------------------------|------------------------|------------------------------|------------------------------|-------------------------------|
|                                |                        | Incidence Rate               | Incidence Rate               |                               |
|                                |                        | Cases / Person-Days          | Cases / Person-Days          |                               |
|                                |                        | [Cases Per 1000 Person-Days] | [Cases Per 1000 Person-Days] |                               |
| BNT162b2<br>(n = 51,795 each)  | Anaphylaxis            | 20 / 1,081,462 [0.018]       | 30 / 1,072,090 [0.028]       | 0.66 (0.36, 1.2)              |
|                                | Arthralgia             | 960 / 1,070,571 [0.9]        | 641 / 1,064,992 [0.6]        | 1.5 (1.3, 1.6)                |
|                                | Chills                 | 193 / 1,079,694 [0.18]       | 247 / 1,069,711 [0.23]       | 0.77 (0.64, 0.94)             |
|                                | CVST                   | 1 / 1,081,728 [0.00092]      | 3 / 1,072,441 [0.0028]       | 0.33 (0.0063, 4.1)            |
|                                | Diarrhea               | 515 / 1,076,282 [0.48]       | 710 / 1,064,493 [0.67]       | 0.72 (0.64, 0.8)              |
|                                | Erythema               | 777 / 1,073,197 [0.72]       | 728 / 1,064,480 [0.68]       | 1.1 (0.96, 1.2)               |
|                                | Facial paralysis       | 14 / 1,081,605 [0.013]       | 35 / 1,072,115 [0.033]       | 0.4 (0.2, 0.76)               |
|                                | Fatigue                | 1206 / 1,068,371 [1.1]       | 1550 / 1,055,120 [1.5]       | 0.77 (0.71, 0.83)             |
|                                | Fever                  | 386 / 1,077,782 [0.36]       | 428 / 1,067,886 [0.4]        | 0.89 (0.78, 1)                |
|                                | Headache               | 1406 / 1,066,337 [1.3]       | 1471 / 1,055,958 [1.4]       | 0.95 (0.88, 1)                |
|                                | Local pain             | 9 / 1,081,623 [0.0083]       | 1 / 1,072,471 [0.00093]      | 8.9 (1.2, 390)                |
|                                | Local swelling         | 5 / 1,081,677 [0.0046]       | 0 / 1,072,491 [0]            | inf (0.91, inf)               |
|                                | Lymphadenopathy        | 340 / 1,078,111 [0.32]       | 353 / 1,068,738 [0.33]       | 0.95 (0.82, 1.1)              |
|                                | Myalgia                | 1005 / 1,070,435 [0.94]      | 726 / 1,064,138 [0.68]       | 1.4 (1.2, 1.5)                |
|                                | Nausea                 | 955 / 1,071,432 [0.89]       | 1252 / 1,058,848 [1.2]       | 0.75 (0.69, 0.82)             |
| Soreness                       | 291 / 1,078,260 [0.27] | 217 / 1,070,100 [0.2]        | 1.3 (1.1, 1.6)               |                               |
| Vomiting                       | 405 / 1,077,503 [0.38] | 689 / 1,065,057 [0.65]       | 0.58 (0.51, 0.66)            |                               |
| mRNA-1273<br>(n = 16,471 each) | Anaphylaxis            | 3 / 344,161 [0.0087]         | 15 / 342,090 [0.044]         | 0.2 (0.037, 0.7)              |
|                                | Arthralgia             | 532 / 338,398 [1.6]          | 328 / 338,846 [0.97]         | 1.6 (1.4, 1.9)                |
|                                | Chills                 | 85 / 343,329 [0.25]          | 75 / 341,473 [0.22]          | 1.1 (0.82, 1.6)               |

|  |                  |                      |                      |                   |
|--|------------------|----------------------|----------------------|-------------------|
|  | CVST             | 0 / 344,197 [0]      | 1 / 342,256 [0.0029] | 0 (0, 39)         |
|  | Diarrhea         | 228 / 341,748 [0.67] | 304 / 338,990 [0.9]  | 0.74 (0.62, 0.89) |
|  | Erythema         | 359 / 340,280 [1.1]  | 276 / 339,289 [0.81] | 1.3 (1.1, 1.5)    |
|  | Facial paralysis | 2 / 344,178 [0.0058] | 10 / 342,197 [0.029] | 0.2 (0.021, 0.93) |
|  | Fatigue          | 648 / 337,172 [1.9]  | 684 / 334,725 [2]    | 0.94 (0.84, 1)    |
|  | Fever            | 178 / 342,315 [0.52] | 184 / 340,344 [0.54] | 0.96 (0.78, 1.2)  |
|  | Headache         | 511 / 338,725 [1.5]  | 506 / 336,848 [1.5]  | 1 (0.89, 1.1)     |
|  | Local pain       | 8 / 344,105 [0.023]  | 2 / 342,260 [0.0058] | 4 (0.79, 38)      |
|  | Local swelling   | 0 / 344,197 [0]      | 0 / 342,271 [0]      | N/A               |
|  | Lymphadenopathy  | 206 / 342,033 [0.6]  | 167 / 340,591 [0.49] | 1.2 (1, 1.5)      |
|  | Myalgia          | 508 / 338,773 [1.5]  | 310 / 338,864 [0.91] | 1.6 (1.4, 1.9)    |
|  | Nausea           | 461 / 339,614 [1.4]  | 450 / 337,308 [1.3]  | 1 (0.89, 1.2)     |
|  | Soreness         | 119 / 342,885 [0.35] | 85 / 341,320 [0.25]  | 1.4 (1, 1.9)      |
|  | Vomiting         | 229 / 341,881 [0.67] | 265 / 339,533 [0.78] | 0.86 (0.72, 1)    |

**Table S10. Incidence rates of adverse effects in the 21 days following the date of the second BNT162b2 or mRNA-1273 dose, related to Figure 3B.** For each adverse effect, incidence rates were calculated for the vaccinated and propensity matched unvaccinated cohorts as the number of positive cases divided by the total number of at-risk person days during this time period. Individuals were considered at risk for developing an adverse effect from their actual or assigned date of first vaccination until they experienced the event, died, or reached the end of the 21-day study period, or until four days prior to a positive SARS-CoV-2 test. For example, we see that 876 cases of fatigue were recorded in the BNT162b2 vaccinated cohort over a total of 809,424 person-days, corresponding to an incidence rate of 1.1 cases per 1000 person-days. N/A, not applicable; inf, infinity.

| <b>Vaccine</b>                 | <b>Adverse effect</b> | <b>Vaccinated Incidence Rate</b><br>Cases / Person-Days<br><i>[Cases Per 1000 Person-Days]</i> | <b>Unvaccinated Incidence Rate</b><br>Cases / Person-Days<br><i>[Cases Per 1000 Person-Days]</i> | <b>Incidence Rate Ratio (95% CI)</b> |
|--------------------------------|-----------------------|------------------------------------------------------------------------------------------------|--------------------------------------------------------------------------------------------------|--------------------------------------|
| BNT162b2<br>(n = 39,058 each)  | Anaphylaxis           | 7 / 819,112 [0.0085]                                                                           | 28 / 793,121 [0.035]                                                                             | 0.24 (0.089, 0.57)                   |
|                                | Arthralgia            | 724 / 810,980 [0.89]                                                                           | 441 / 788,048 [0.56]                                                                             | 1.6 (1.4, 1.8)                       |
|                                | Chills                | 151 / 817,291 [0.18]                                                                           | 185 / 791,471 [0.23]                                                                             | 0.79 (0.63, 0.99)                    |
|                                | CVST                  | 0 / 819,195 [0]                                                                                | 1 / 793,439 [0.0013]                                                                             | 0 (0, 38)                            |
|                                | Diarrhea              | 357 / 815,230 [0.44]                                                                           | 519 / 787,601 [0.66]                                                                             | 0.66 (0.58, 0.76)                    |
|                                | Erythema              | 646 / 811,854 [0.8]                                                                            | 522 / 787,621 [0.66]                                                                             | 1.2 (1.1, 1.3)                       |
|                                | Facial paralysis      | 8 / 819,084 [0.0098]                                                                           | 20 / 793,248 [0.025]                                                                             | 0.39 (0.15, 0.92)                    |
|                                | Fatigue               | 876 / 809,424 [1.1]                                                                            | 1089 / 781,165 [1.4]                                                                             | 0.78 (0.71, 0.85)                    |
|                                | Fever                 | 247 / 816,558 [0.3]                                                                            | 306 / 789,917 [0.39]                                                                             | 0.78 (0.66, 0.93)                    |
|                                | Headache              | 930 / 808,359 [1.2]                                                                            | 1024 / 781,805 [1.3]                                                                             | 0.88 (0.8, 0.96)                     |
|                                | Local pain            | 4 / 819,135 [0.0049]                                                                           | 1 / 793,452 [0.0013]                                                                             | 3.9 (0.38, 190)                      |
|                                | Local swelling        | 1 / 819,190 [0.0012]                                                                           | 2 / 793,431 [0.0025]                                                                             | 0.48 (0.0082, 9.3)                   |
|                                | Lymphadenopathy       | 270 / 816,106 [0.33]                                                                           | 251 / 790,552 [0.32]                                                                             | 1 (0.87, 1.2)                        |
|                                | Myalgia               | 742 / 810,422 [0.92]                                                                           | 496 / 787,476 [0.63]                                                                             | 1.5 (1.3, 1.6)                       |
|                                | Nausea                | 656 / 811,917 [0.81]                                                                           | 871 / 783,439 [1.1]                                                                              | 0.73 (0.66, 0.81)                    |
| Soreness                       | 215 / 816,617 [0.26]  | 148 / 791,802 [0.19]                                                                           | 1.4 (1.1, 1.7)                                                                                   |                                      |
| Vomiting                       | 288 / 816,148 [0.35]  | 511 / 787,587 [0.65]                                                                           | 0.54 (0.47, 0.63)                                                                                |                                      |
| mRNA-1273<br>(n = 11,851 each) | Anaphylaxis           | 2 / 248,751 [0.008]                                                                            | 10 / 240,935 [0.042]                                                                             | 0.19 (0.021, 0.91)                   |
|                                | Arthralgia            | 407 / 244,300 [1.7]                                                                            | 192 / 238,949 [0.8]                                                                              | 2.1 (1.7, 2.5)                       |
|                                | Chills                | 68 / 247,995 [0.27]                                                                            | 62 / 240,371 [0.26]                                                                              | 1.1 (0.74, 1.5)                      |

|  |                  |                      |                      |                    |
|--|------------------|----------------------|----------------------|--------------------|
|  | CVST             | 0 / 248,773 [0]      | 0 / 241,065 [0]      | N/A                |
|  | Diarrhea         | 141 / 247,286 [0.57] | 208 / 238,702 [0.87] | 0.65 (0.52, 0.81)  |
|  | Erythema         | 249 / 245,850 [1]    | 177 / 238,991 [0.74] | 1.4 (1.1, 1.7)     |
|  | Facial paralysis | 2 / 248,760 [0.008]  | 10 / 240,944 [0.042] | 0.19 (0.021, 0.91) |
|  | Fatigue          | 447 / 243,764 [1.8]  | 439 / 236,165 [1.9]  | 0.99 (0.86, 1.1)   |
|  | Fever            | 143 / 247,308 [0.58] | 112 / 239,775 [0.47] | 1.2 (0.96, 1.6)    |
|  | Headache         | 345 / 245,067 [1.4]  | 284 / 237,788 [1.2]  | 1.2 (1, 1.4)       |
|  | Local pain       | 3 / 248,746 [0.012]  | 0 / 241,065 [0]      | inf (0.4, inf)     |
|  | Local swelling   | 0 / 248,773 [0]      | 0 / 241,065 [0]      | N/A                |
|  | Lymphadenopathy  | 133 / 247,290 [0.54] | 109 / 239,806 [0.45] | 1.2 (0.91, 1.5)    |
|  | Myalgia          | 376 / 244,445 [1.5]  | 191 / 238,863 [0.8]  | 1.9 (1.6, 2.3)     |
|  | Nausea           | 281 / 245,763 [1.1]  | 294 / 237,547 [1.2]  | 0.92 (0.78, 1.1)   |
|  | Soreness         | 76 / 247,875 [0.31]  | 46 / 240,477 [0.19]  | 1.6 (1.1, 2.4)     |
|  | Vomiting         | 135 / 247,341 [0.55] | 164 / 239,199 [0.69] | 0.8 (0.63, 1)      |

**Table S11. Number of individuals contributing at-risk person days to the analyses of adverse effect incidence rates after each dose, related to Figures 2-3 and Tables 3-4.** The number of individuals contributing at-risk person days is lower than the total number of individuals who received each vaccine (BNT162b2:  $n_{\text{At least 1 Dose}} = 51,795$  and  $n_{2 \text{ Doses}} = 39,058$ ; mRNA-1273:  $n_{\text{At least 1 Dose}} = 16,471$  and  $n_{2 \text{ Doses}} = 11,851$ ), and the number of vaccinated and unvaccinated individuals is slightly different for each comparison. This is true because at-risk person days were defined as the number of days from the start of the time period to the day on which the individual experienced the adverse effect or died, or four days prior to testing positive for SARS-CoV-2. Thus, if an individual tested positive for SARS-CoV-2 four or fewer days after the first dose, they contribute no at-risk time for the post-first dose analyses. Similarly, if an individual tested positive for SARS-CoV-2 before the second dose or within four days after it, they contribute no at-risk time for the post-second dose analyses.

| Vaccine   | Number of doses | Vaccinated Cohort | Unvaccinated Cohort |
|-----------|-----------------|-------------------|---------------------|
| BNT162b2  | At least 1      | 51,732            | 51,573              |
|           | 2               | 39,045            | 38,255              |
| mRNA-1273 | At least 1      | 16,455            | 16,423              |
|           | 2               | 11,849            | 11,645              |
